# Supplementary material for: Demonstrated Wavelength Portability of Raman Reference Data for Explosives and Chemical Detection
Source: Hindawi journal article supplement (doi:10.1155/2012/297056), 2012-07-05
Supplement: f1 [file 297056.f1.xlsx]

## Sheet: Sheet1
Count	Species	alcohol	aldehyde	alkane	alkene alkyne	amide carbamide	amine	amino acid	aromatic	carbo-hydrate	carboxylic acid	ester	ether	halo-organic	ketone	nitrile nitro	phosphine phosphonate	sulfide thiol	sulfate sulfone	borane	inorganic salt	mineral dirt	mineral acid	organo-metallic	peroxide water	building material	house hold product	synthetic or natural fiber	fluorescent
1	1-Iodobutane													1
2	1,4-diPhenylbutadiyne				1				1
3	1,3-dichlrobenzene								1					1
4	3-Nitrobenzyl chloride								1					1		1
5	Acetone														1
6	Acetonitrile															1
7	Acid red 52 dye						1		1				1						1
8	ammonia-borane																			1
9	ammonium chloride																				1
10	aspartic acid						1	1			1
11	aspirin								1		1	1
12	Barium sulfate																				1
13	benzaldehyde		1						1
14	Benzene								1
15	Benzophenone								1						1
16	Brake fluid	1											1
17	butanal		1
18	Calcium hypochlorite																				1
19	Calcium sulfate																				1
20	Camphor														1
21	Cane sugar	1								1			1
22	Caprylic acid										1
23	Carbon disulfide																	1
24	Carbon tetrachloride													1
25	Chloroform													1
26	Cholesterol	1
27	Cholesteryl oleate											1
28	Chrysene								1
29	Citrate concentrate	1									1
30	Coffee creamer					1				1		1
31	concrete																									1
32	cotton												1															1
33	Crystal violet laser day						1		1
34	Cyclohexane			1
35	Cyclohexanone														1
36	Decanoic acid										1
37	Dibutylphthalate								1			1
38	Dichloromethane													1
39	Dicyclopentadiene				1
40	Diethyl ether												1
41	dimethyl methyl phosphonate																1
42	dimethylsulfone																		1
43	dimetyl sulfoxide																		1
44	diphenylacetylene				1				1
45	Diphenylamine						1		1
46	diphenyldisulfide								1									1
47	Dodecane			1
48	Dolomite pink																					1
49	Dolomite white																					1
50	Eastern WA desert silt																					1
51	Erbium (III) oxide																				1
52	ethanol	1
53	Ethyl centrlalite					1			1
54	EDTA						1				1
55	ferrocene								1															1
56	fluorene								1
57	Fructose	1								1			1
58	Gasoline			1	1				1
59	glucose	1								1			1
60	Glycerin	1
61	Glyceryl tridecanoate											1
62	glycine						1	1			1
63	Gum Rosin				1						1
64	Hair Gel																										1
65	Hematite																					1
66	hexadecyldodecanoate											1
67	Hexane	1
68	Hexanoic acid										1
69	Holmium carbonate																				1
70	Hydrogen peroxide- 50% aq.																								1
71	Iron oxide																				1	1
72	Isopropyl alcohol	1
73	Lauric acid										1
74	Methanol	1
75	methyl carbamate					1						1
76	N,N Dimethylaniline						1
77	N,N-dimethylformamide					1
78	nitric acid																						1
79	Nitrobenzene								1							1
80	N-Phenyl-2-napthylamine						1		1
81	Obsidian (volcanic glass igneous rock)																					1
82	Oleic acid										1
83	Palmitic acid										1
84	Paraffin wax			1
85	petroleum jelly			1																							1
86	phosphoric acid																						1
87	Poly(styrene-co-butadiene)				1				1
88	Polyisobutylene			1
89	potassium chlorate																				1
90	potassium nitrate																				1
91	potassium permanganate																				1
92	potassium sulfate																				1
93	propyl cyclopentadiene tricarbonyl molybdenum dimer								1															1
94	Pyridine						1		1
95	samarium nitrate																				1
96	sodium chlorate																				1
97	sodium cyanide																				1
98	sodium nitrate																				1
99	sodium sulfate																				1
100	sodium thiosulfate																				1
101	Stearyl stearate											1
102	Styrene				1				1
103	Succinic acid										1
104	Sulfuric acid																						1
105	Talc																					1					1
106	tetraglyme												1
107	tetrahydrofuran												1
108	Toluene								1
109	toothpaste																										1
110	Triacetin											1
111	tributylcitrate	1										1
112	tributylphosphate																1
113	Triethanolamine	1					1
114	trioctyl phosphine oxide																1
115	triphenyl phosphine								1								1
116	tris-bipyridyl ruthenium II chloride						1		1															1
117	urea					1
118	Valerol											1			1
119	Vanillin	1	1						1				1
120	Water																								1
121	wool																											1
122	wood												1													1
123	xylene-ortho								1
124	xylene-meta								1
125	xylene-para								1
		14	3	6	7	5	11	2	31	4	13	11	11	6	5	3	4	2	3	1	17	7	3	3	2	2	4	2	>10
